# Supplementary material
Source: Springer Nature journal article supplement (https://www.springermedizin.de/resource/supplementary/12873_2011_164_MOESM3_ESM.pdf/9431566)
Supplement: MOESM3 [file 9431566]

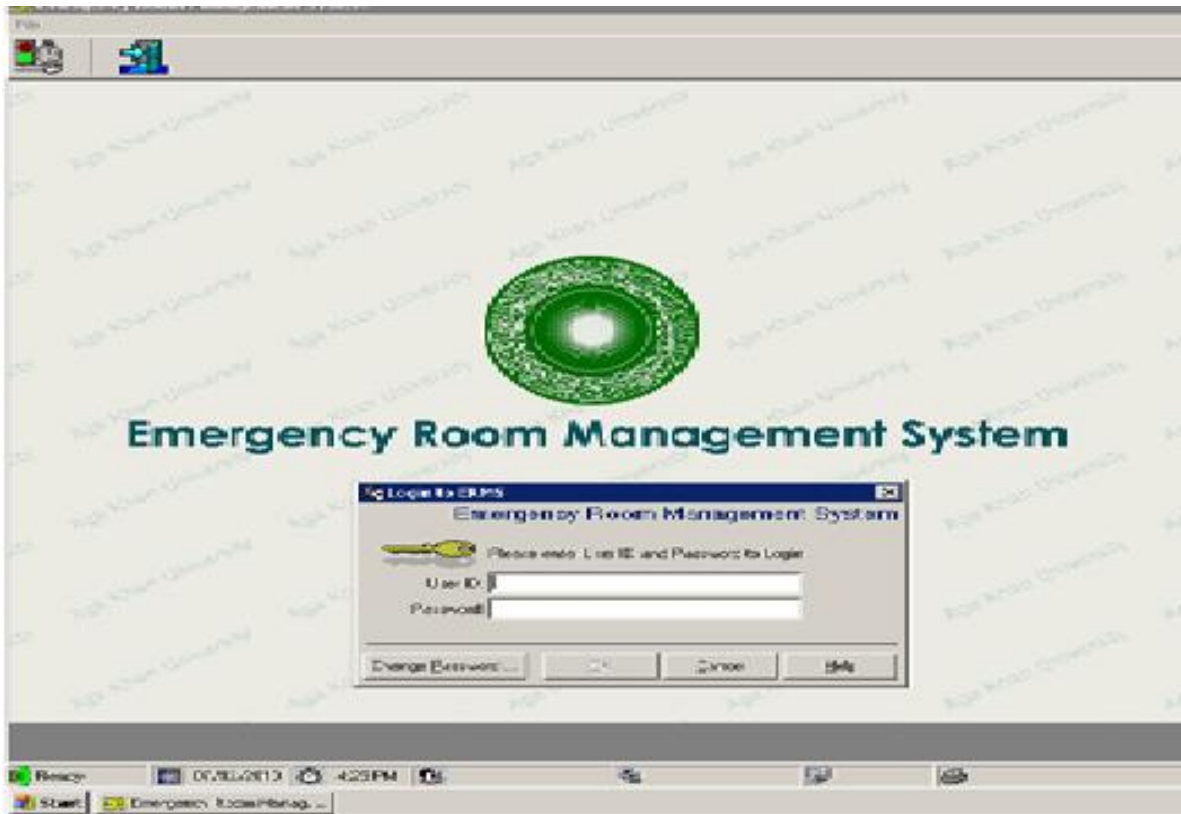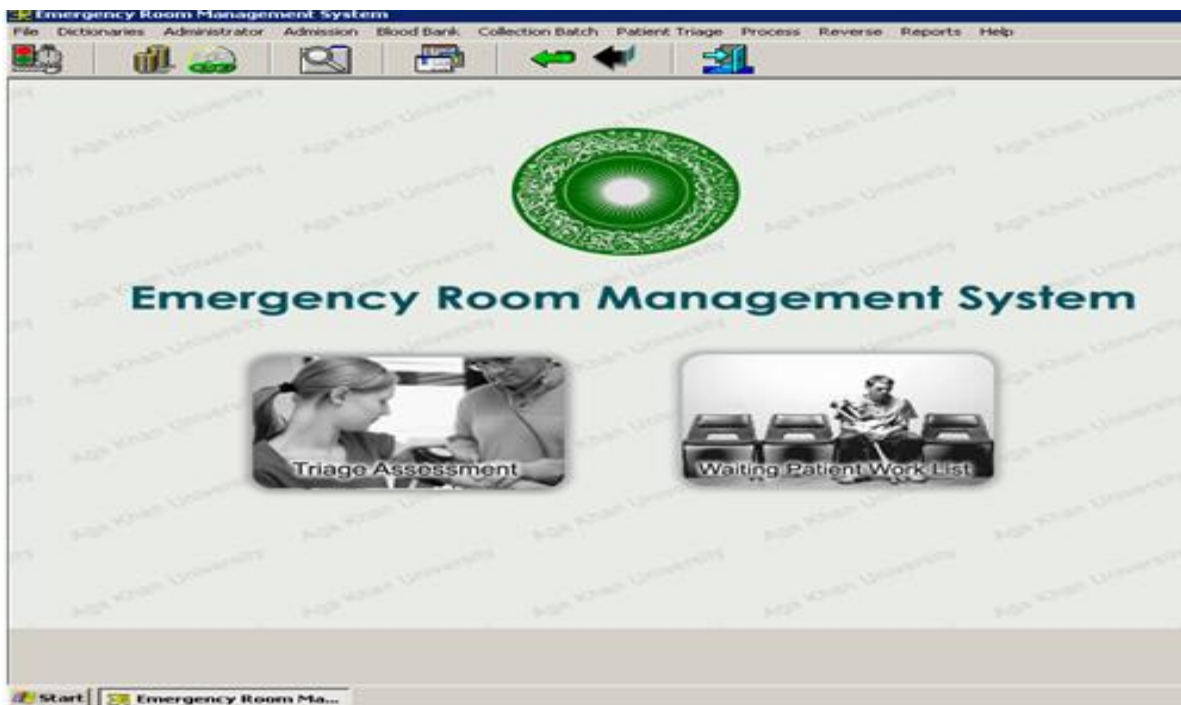

Emergency Room Management System

File Dictionaries Administrator Admission Blood Bank Collection Batch Patient Triage Process Reverse Reports Help

**Triage Assessment**

Triage Assessment # AUTO   Press [F4] for New Patient

Assessment Date Time 07/12/2010 16:30:46

Patient Name

Triage Category

Admission No. P1 P2 P3 P4 Ticket No. Patient Status

**Vital Sign and Disposition** Complaints Demographics

| Name  | Value | Unit  |
|-------|-------|-------|
| BP    |       | mm-Hg |
| HR    |       | /min  |
| PULSE |       | /min  |
| RR    |       | /min  |
| SAD2  |       | %     |
| TEMP  |       | C     |
| WT    |       | kg    |

Input Format of Vital Sign

Specialty

Disposition

Triage Doctor MUNK **Munawar Khursheed**

Bed Assigned  Yes  No

Bed No

Analgesia

Emergency Room Management System

File Dictionaries Administrator Admission Blood Bank Collection Batch Patient Triage Process Reverse Reports Help

**Triage Assessment**

Triage Assessment # AUTO   Press [F4] for New Patient

Assessment Date Time 07/12/2010 16:34:01

Patient Name

Triage Category

Admission No. Ticket No. Patient Status

**Vital Sign and Disposition** **Complaints** Demographics

Find What Search In

Find in Beginning  Use Pattern Matching  Match Case  Find Whole Word Only

| Complaints | Description               | Pat. Complaints | Description |
|------------|---------------------------|-----------------|-------------|
| ABDPAIN    | Abdominal Pain            |                 |             |
| ABRASION   | Minor Abrasions & Sprains |                 |             |
| ABSCISS    | Abscess                   |                 |             |
| AIRWAYOBS  | Acute Airway Obstruction  |                 |             |

Complaints

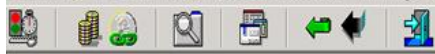

Emergency Room Management System



## Emergency Room Management System



Triage Assessment

**ER Bed Statistics**

| ER Bed Statistics                  |            |               |             |
|------------------------------------|------------|---------------|-------------|
| Disposition                        | Total Beds | Occupied Beds | Vacant Beds |
| Back Area / Non Critical Care Area | 15         | 1             | 14          |
| Critical Care / Front Area         | 16         | 0             | 16          |
| Clinical Decision Unit             | 8          | 4             | 4           |
| Emergency Room                     | 6          | 0             | 6           |
| Fast Track                         | 12         | 2             | 10          |
| Isolation Room                     | 1          | 0             | 1           |
| Pediatrics Area                    | 10         | 8             | 2           |
| Resuscitation Room -1              | 6          | 1             | 5           |
| Resuscitation Step Down            | 6          | 0             | 6           |
| Triage Area                        | 3          | 0             | 3           |
| <b>Total :</b>                     | <b>83</b>  | <b>16</b>     | <b>67</b>   |

Refresh Close
